# Supplementary material for: Prevalence of obesity, hypertension, and diabetes, and cascade of care in sub-Saharan Africa: a cross-sectional, population-based study in rural and urban Malawi
Source: PubMed Central journal article supplement (PMC5835666; doi:10.1016/s2213-8587(17)30432-1), 2018-03
Supplement: mmc1.pdf [file mmc1.pdf]

# THE LANCET

## Diabetes & Endocrinology

### Supplementary appendix

This appendix formed part of the original submission and has been peer reviewed. We post it as supplied by the authors.

Supplement to: Price A J, Crampin A C, Amberbir A, et al. Prevalence of obesity, hypertension, and diabetes, and cascade of care in sub-Saharan Africa: a cross-sectional, population-based study in rural and urban Malawi. *Lancet Diabetes Endocrinol* 2018; published online Jan 19. [http://dx.doi.org/10.1016/S2213-8587\(17\)30432-1](http://dx.doi.org/10.1016/S2213-8587(17)30432-1).

## Supplemental materials

---

### **The prevalence of obesity, hypertension and diabetes, and cascade of care in sub-Saharan Africa: a large population-based study in rural and urban Malawi**

#### **Contents**

**Suppl. Figure 1. Conceptual model of risk factors for cardiometabolic outcomes (*page 2*)**

**Suppl. Figure 2. Adult population distributions and participation proportion of a) rural and b) urban populations (*page 3*)**

**Suppl. Figure 3. Distribution of Body Mass Index by site, sex and age group (*page 4*)**

**Suppl. Figure 4. Distribution of blood pressure by site, sex and age group (*page 5*)**

**Suppl. Figure 5. Distribution of blood glucose by site, sex and age group (*page 6*)**

**Suppl. Table 1: Association of urbanicity and gender with other hypertension, diabetes and anthropometry indices (*page 7*)**

**Suppl. Table 2: Stratified analyses for overweight/obesity (*page 8*)**

**Suppl. Table 3: Stratified analyses for hypertension (*page 9*)**

**Suppl. Table 4: Hypertension: Screening, cascade of care, access to diagnostic test, diagnosis, medication and control (*page 10*)**

**Suppl. Table 5: Diabetes: Screening, cascade of care, access to diagnostic test, diagnosis, medication and control (*page 11*)**

**Suppl. Table 6: Associations of risk factors with multi-morbidity – age-adjusted and distal factor adjusted risk ratios (*page 12*)**

**Suppl. Table 7: Prevalence of co-morbidities amongst diabetic and hypertensive patients (*page 13*)**

**Suppl. Table 8: Risk ratios (RR) for associations between a previous diagnosis and treatment for hypertension or diabetes and a diagnosis and medication for the other condition (*page 14*)**

**Supplementary Figure 1. Conceptual model of risk factors for cardiometabolic outcomes**

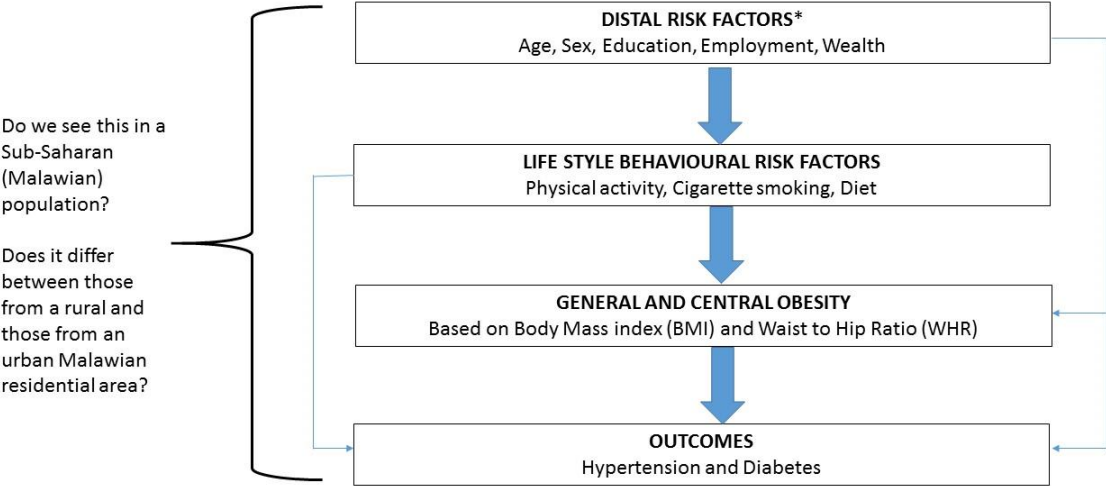

**Supplementary Figure 2: Adult population distributions and participation proportion of a) rural and b) urban populations**

Notes: Lowest age band consists of only two years. Ages of non-participants in urban populations are estimates.

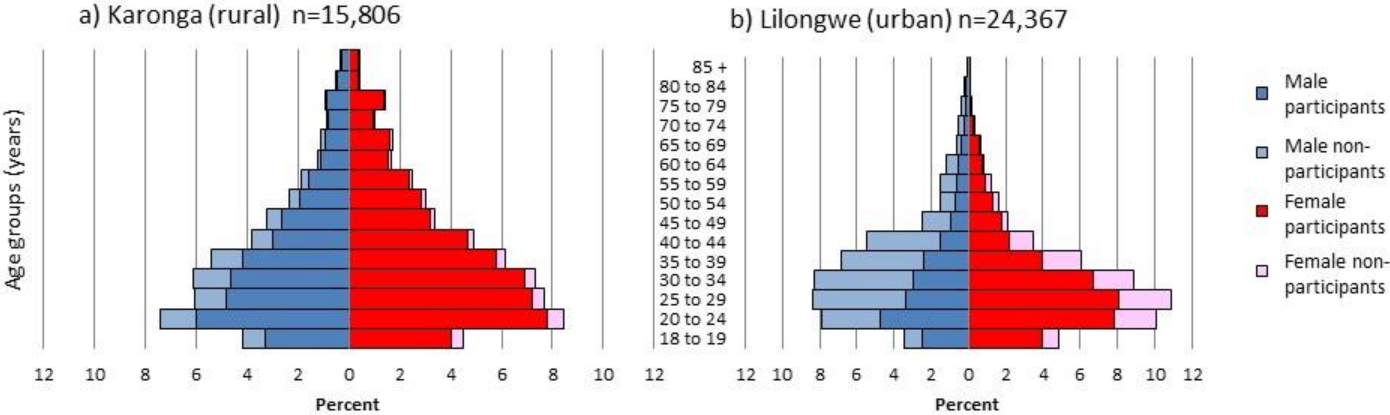

Supplementary Figure 3. Distribution of Body Mass Index by site, sex and age group

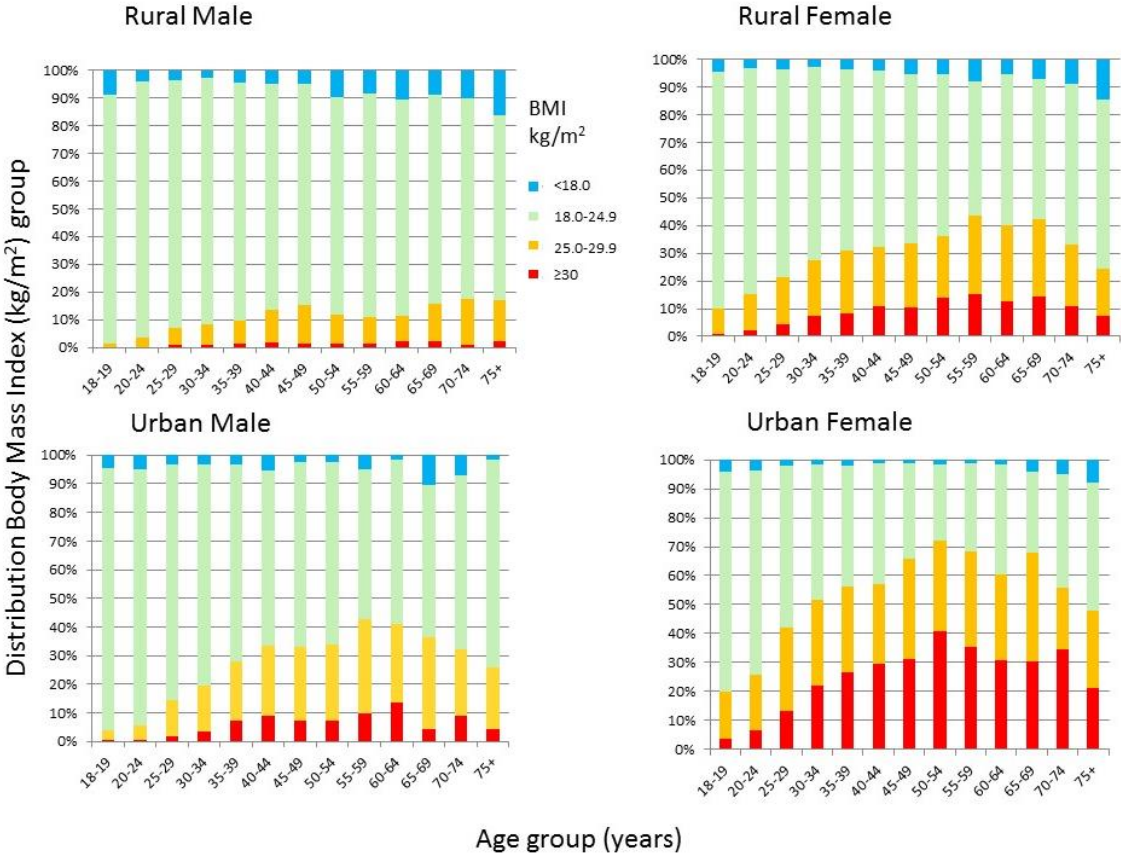

**Supplementary Figure 4. Distribution of blood pressure by site, sex and age group**

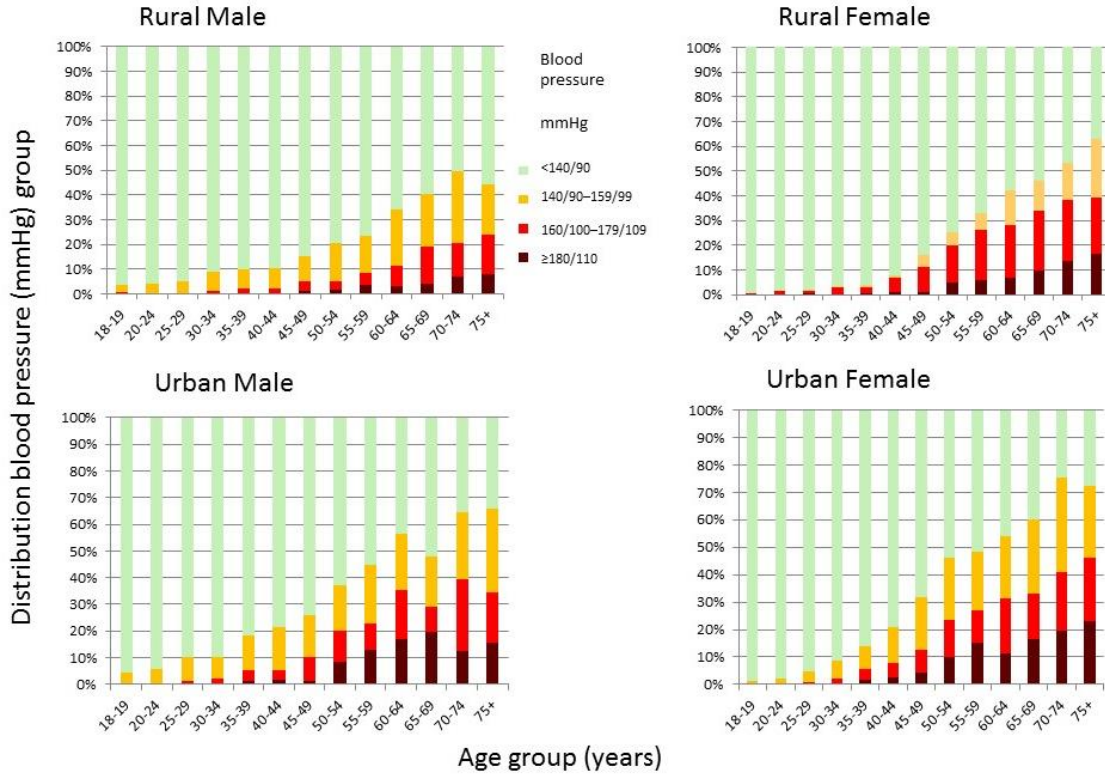

**Supplementary Figure 5. Distribution of blood glucose by site, sex and age group**

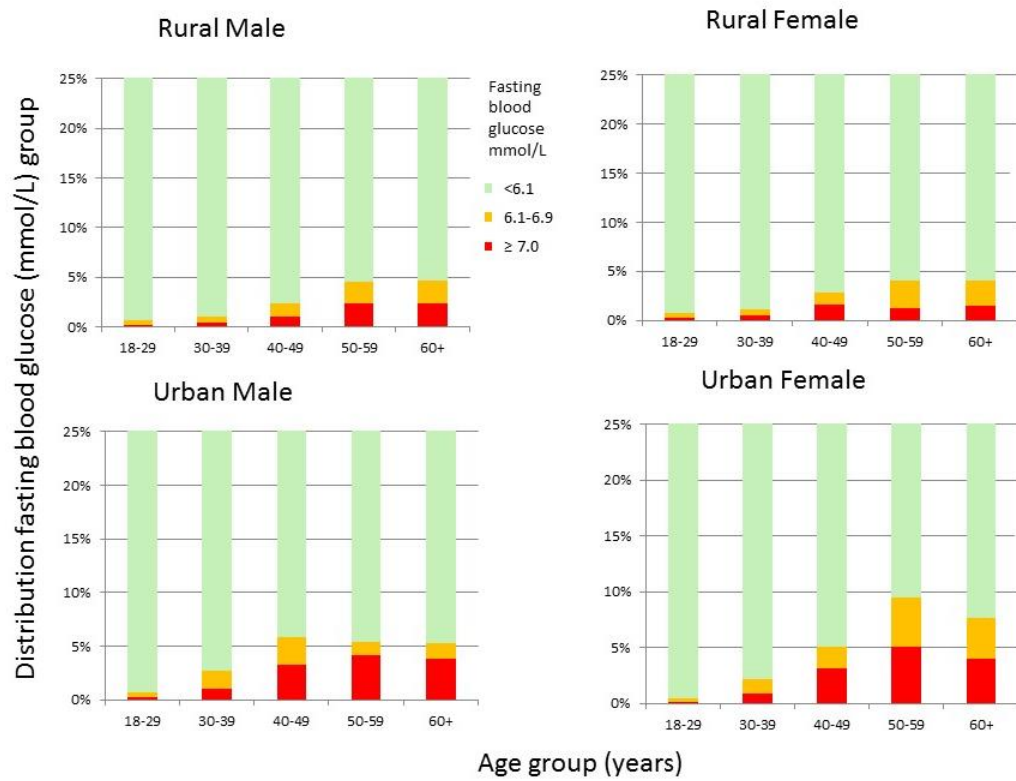

**Supplementary Table 1. Association of urbanicity and gender with other hypertension, diabetes and anthropometry indices**

|                                                      | <b>Rural<sup>1</sup></b> | <b>Urban<sup>1</sup></b> | <b>Male<sup>2</sup></b> | <b>Female<sup>2</sup></b> |
|------------------------------------------------------|--------------------------|--------------------------|-------------------------|---------------------------|
| <b>Waist-to-hip ratio high</b>                       |                          |                          |                         |                           |
| n (%)                                                | 5,158 (38.7%)            | 3,063 (21.1%)            | 2,030 (18.4%)           | 6,191 (36.9%)             |
| Risk Ratio (Basic adjustment)                        | Ref                      | 0.63 (0.60-0.65)         | Ref                     | 2.17 (2.08-2.26)          |
| Adjusted Risk Ratio <sup>3</sup>                     | Ref                      | 0.67 (0.64-0.71)         | Ref                     | 2.14 (2.05-2.23)          |
| <b>Untreated Mod/Severe Hypertension<sup>3</sup></b> |                          |                          |                         |                           |
| n (%)                                                | 435 (3.3%)               | 513 (3.6%)               | 369 (3.4%)              | 579 (3.4%)                |
| Risk Ratio (Basic adjustment)                        | Ref                      | 2.10 (1.86-2.38)         | Ref                     | 1.14 (1.01-1.30)          |
| Adjusted Risk Ratio                                  | Ref                      | 1.67 (1.42-1.99)         | Ref                     | 1.13 (0.99-1.30)          |
| <b>On Hypertension medication</b>                    |                          |                          |                         |                           |
| n (%)                                                | 509 (3.7%)               | 680 (4.5%)               | 307 (2.8%)              | 882 (5.0%)                |
| Risk Ratio (Basic adjustment)                        | Ref                      | 2.34 (2.11-2.60)         | Ref                     | 1.98 (1.75-2.23)          |
| Adjusted Risk Ratio                                  | Ref                      | 1.37 (1.18-1.58)         | Ref                     | 2.51 (2.20-2.86)          |
| <b>Undiagnosed diabetes<sup>4</sup></b>              |                          |                          |                         |                           |
| n (%)                                                | 98 (0.8%)                | 135 (1.2%)               | 92 (1.0%)               | 141 (1.0%)                |
| Risk Ratio (Basic adjustment)                        | Ref                      | 2.06 (1.57-2.68)         | Ref                     | 0.95 (0.73-1.23)          |
| Adjusted Risk Ratio                                  | Ref                      | 1.58 (1.05-2.37)         | Ref                     | 0.97 (0.93-1.28)          |
| <b>On diabetes medication</b>                        |                          |                          |                         |                           |
| n (%)                                                | 80 (0.58%)               | 147 (0.98%)              | 88 (0.80%)              | 139 (0.78%)               |
| Risk Ratio (Basic adjustment)                        | Ref                      | 2.90 (2.22-3.78)         | Ref                     | 1.03 (0.79-1.34)          |
| Adjusted Risk Ratio                                  | Ref                      | 1.44 (0.97-2.13)         | Ref                     | 1.43 (1.08-1.90)          |

<sup>1</sup> Adjusted for age & sex

<sup>2</sup> Adjusted for age & site

<sup>3</sup> Untreated moderate or severe blood pressure systolic  $\geq$  160 mmHg and/or diastolic  $\geq$  100 mmHg and not on medication

<sup>4</sup> Undiagnosed diabetes: plasma glucose  $\geq$  7mmol/L and no prior diagnosis of diabetes



**Supplementary Table 2. Stratified analyses for overweight/obesity**

| Overweight or obesity <sup>1</sup> Adjusted Risk Ratio <sup>2</sup> (95%CI) |                  |                  |                  |                   |                    |                  |
|-----------------------------------------------------------------------------|------------------|------------------|------------------|-------------------|--------------------|------------------|
| Age – sex stratification                                                    |                  |                  |                  |                   |                    |                  |
|                                                                             | Male < 30 years  | Male 30-50 years | Male 50+ years   | Female < 30 Years | Female 30-50 years | Female 50+ years |
| <b>Site</b>                                                                 |                  |                  |                  |                   |                    |                  |
| Karonga (rural)                                                             | Ref              | Ref              | Ref              | Ref               | Ref                | Ref              |
| Lilongwe (urban)                                                            | 1.70 (1.22-2.38) | 1.12 (0.94-1.33) | 1.51 (1.20-1.89) | 1.76 (1.52-2.03)  | 1.33 (0.21-1.46)   | 1.35 (1.21-1.51) |
| <b>Wealth quintiles</b>                                                     |                  |                  |                  |                   |                    |                  |
| Poorest                                                                     | Ref              | Ref              | Ref              | Ref               | Ref                | Ref              |
| 2                                                                           | 1.65 (1.08-2.53) | 1.38 (0.98-1.94) | 1.02 (0.67-1.55) | 1.13 (0.96-1.32)  | 1.16 (1.02-1.31)   | 1.11 (0.96-1.30) |
| 3                                                                           | 1.37 (0.86-2.13) | 2.39 (1.73-3.30) | 1.40 (0.94-2.07) | 1.25 (1.08-1.44)  | 1.31 (1.17-1.47)   | 1.40 (1.21-1.61) |
| 4                                                                           | 1.53 (1.01-2.30) | 2.90 (2.12-3.95) | 1.57 (0.06-2.33) | 1.34 (1.17-1.55)  | 1.51 (0.35-1.69)   | 1.40 (1.21-1.62) |
| Wealthiest                                                                  | 1.80 (1.17-2.77) | 4.22 (3.08-5.80) | 2.37 (1.60-3.51) | 1.48 (1.28-1.72)  | 1.77 (1.58-1.97)   | 1.71 (1.47-1.97) |
| <b>Education</b>                                                            |                  |                  |                  |                   |                    |                  |
| None                                                                        | 0.83 (0.14-0.55) | 0.17 (0.03-1.00) | 1.12 (0.68-1.86) | 0.91 (0.66-1.26)  | 0.97 (0.83-1.14)   | 0.84 (0.74-0.96) |
| Standard1-5                                                                 | 0.67 (0.32-1.39) | 0.75 (0.50-1.13) | 1.03 (0.75-1.41) | 1.01 (0.84-1.20)  | 0.97 (0.88-1.07)   | 0.88 (0.80-0.98) |
| Standard 6-8                                                                | Ref              | Ref              | Ref              | Ref               | Ref                | Ref              |
| Secondary                                                                   | 1.18 (0.86-1.63) | 0.95 (0.79-1.14) | 1.75 (1.39-2.20) | 0.96 (0.87-1.06)  | 1.02 (0.95-1.09)   | 1.15 (1.03-1.27) |
| Post-secondary                                                              | 2.09 (1.41-3.08) | 1.36 (1.09-1.68) | 1.71 (1.32-2.21) | 0.98 (0.84-1.15)  | 1.13 (1.03-1.25)   | 1.16 (0.99-1.37) |
| <b>Employment</b>                                                           |                  |                  |                  |                   |                    |                  |
| Not working                                                                 | 0.40 (0.29-0.55) | 0.61 (0.44-0.84) | 1.05 (0.83-1.32) | 0.60 (0.53-0.68)  | 0.80 (0.71-0.90)   | 0.88 (0.74-0.97) |
| Housework                                                                   | 0.41 (0.21-0.82) | 0.57 (0.33-0.98) | 0.83 (0.52-1.33) | 0.80 (0.72-0.90)  | 0.86 (0.80-0.92)   | 0.91 (0.81-1.02) |
| Subsistence                                                                 | 0.89 (0.58-1.36) | 0.52 (0.41-0.67) | 0.72 (0.52-0.98) | 0.76 (0.63-0.91)  | 0.69 (0.62-0.77)   | 0.82 (0.72-0.95) |
| Self-employed                                                               | Ref              | Ref              | Ref              | Ref               | Ref                | Ref              |
| Salaried                                                                    | 0.96 (0.68-1.33) | 1.00 (0.86-1.17) | 0.93 (0.73-1.19) | 0.80 (0.69-0.93)  | 0.87 (0.80-0.95)   | 0.92 (0.76-1.10) |
| Site – sex stratification                                                   |                  |                  |                  |                   |                    |                  |
|                                                                             | Rural Male       | Rural Female     | Urban Male       | Urban Female      |                    |                  |
| <b>Age group; years</b>                                                     |                  |                  |                  |                   |                    |                  |
| 18-29                                                                       | Ref              | Ref              | Ref              | Ref               |                    |                  |
| 30-39                                                                       | 2.06 (1.55-2.72) | 1.72 (1.53-1.93) | 2.24 (1.86-2.70) | 1.58 (1.49-1.68)  |                    |                  |
| 40-49                                                                       | 3.00 (2.27-3.97) | 1.97 (1.73-2.22) | 3.07 (2.53-3.71) | 1.75 (0.63-1.87)  |                    |                  |
| 50-59                                                                       | 2.54 (1.83-3.53) | 2.48 (2.19-2.82) | 3.82 (3.12-4.69) | 2.09 (1.94-2.25)  |                    |                  |
| 60-69                                                                       | 3.25 (2.26-4.67) | 2.77 (2.40-3.21) | 5.13 (4.13-6.36) | 2.05 (1.85-2.26)  |                    |                  |
| 70+                                                                         | 5.05 (3.70-6.89) | 1.97 (1.62-2.39) | 5.35 (3.93-7.28) | 1.77 (1.50-2.09)  |                    |                  |
| <b>Wealth quintiles</b>                                                     |                  |                  |                  |                   |                    |                  |
| Poorest                                                                     | Ref              | Ref              | Ref              | Ref               |                    |                  |
| 2                                                                           | 1.24 (0.94-1.65) | 1.11 (0.99-1.24) | 1.31 (0.90-1.90) | 1.16 (1.02-1.30)  |                    |                  |
| 3                                                                           | 1.78 (1.34-2.37) | 1.25 (1.11-1.40) | 1.71 (1.22-2.39) | 1.32 (1.18-1.46)  |                    |                  |
| 4                                                                           | 1.66 (1.24-2.24) | 1.37 (1.22-1.55) | 2.22 (1.61-3.06) | 1.46 (1.21-1.61)  |                    |                  |
| Wealthiest                                                                  | 3.07 (2.26-4.17) | 1.62 (1.41-1.86) | 2.71 (1.97-3.73) | 1.67 (1.51-1.85)  |                    |                  |
| <b>Education</b>                                                            |                  |                  |                  |                   |                    |                  |
| None                                                                        | 0.72 (0.37-1.39) | 0.89 (0.75-1.03) | 0.74 (0.41-1.33) | 0.91 (0.82-1.03)  |                    |                  |
| Standard1-5                                                                 | 0.78 (0.57-1.06) | 0.90 (0.80-0.99) | 0.80 (0.56-1.16) | 0.99 (0.91-1.07)  |                    |                  |
| Standard 6-8                                                                | Ref              | Ref              | Ref              | Ref               |                    |                  |
| Secondary                                                                   | 1.20 (0.99-1.45) | 1.04 (0.94-1.15) | 1.25 (1.03-1.51) | 1.00 (0.94-1.06)  |                    |                  |
| Post-secondary                                                              | 0.96 (0.65-1.41) | 0.91 (0.67-1.24) | 1.96 (1.60-2.40) | 1.09 (1.00-1.18)  |                    |                  |
| <b>Employment</b>                                                           |                  |                  |                  |                   |                    |                  |
| Not working                                                                 | 0.70 (0.52-0.95) | 0.75 (0.63-0.88) | 0.50 (0.41-0.60) | 0.68 (0.63-0.74)  |                    |                  |
| Housework                                                                   | 0.54 (0.19-1.49) | 0.72 (0.62-0.84) | 0.53 (0.38-0.73) | 0.88 (0.83-0.93)  |                    |                  |
| Subsistence                                                                 | 0.65 (0.52-0.82) | 0.72 (0.65-0.80) | 1.22 (0.67-2.22) | 0.75 (0.55-1.04)  |                    |                  |
| Self-employed                                                               | Ref              | Ref              | Ref              | Ref               |                    |                  |
| Salaried                                                                    | 1.27 (0.97-1.65) | 1.08 (0.87-1.32) | 0.90 (0.78-1.03) | 0.85 (0.79-0.92)  |                    |                  |

<sup>1</sup>BMI  $\geq$ 25kg/m<sup>2</sup>

<sup>2</sup>Adjusted for distal factors; age, site (urban/rural), wealth, education, occupation (see Suppl. Figure 1. Conceptual model of risk factors for cardiometabolic outcomes (web appendix page 2)).

**Supplementary Table 3. Stratified analyses for hypertension**

| Hypertension <sup>1</sup> Adjusted Risk Ratio <sup>2</sup> (95%CI) |                   |                   |                  |                   |                        |                  |
|--------------------------------------------------------------------|-------------------|-------------------|------------------|-------------------|------------------------|------------------|
| Age – sex stratification                                           |                   |                   |                  |                   |                        |                  |
|                                                                    | Male < 30 years   | Male 30-50 years  | Male 50+ years   | Female < 30 Years | Female 30-50 years     | Female 50+ years |
| <b>Site</b>                                                        |                   |                   |                  |                   |                        |                  |
| Karonga (rural)                                                    | Ref               | Ref               | Ref              | Ref               | Ref                    | Ref              |
| Lilongwe (urban)                                                   | 1.78 (1.27-2.49)  | 1.31 (1.05-1.63)  | 1.22 (1.06-1.41) | 1.32 (0.84-2.07)  | 1.56 (1.24-1.96)       | 1.10 (1.00-1.22) |
| <b>Wealth quintiles</b>                                            |                   |                   |                  |                   |                        |                  |
| Poorest                                                            | Ref               | Ref               | Ref              | Ref               | Ref                    | Ref              |
| 2                                                                  | 1.12 (0.76-1.66)  | 1.25 (0.95-1.66)  | 0.98 (0.79-1.21) | 0.75 (0.45-1.26)  | 1.36 (1.03-1.80)       | 0.96 (0.86-1.09) |
| 3                                                                  | 1.23 (0.84-1.81)  | 1.38 (1.04-1.84)  | 1.13 (0.92-1.40) | 1.02 (0.63-1.65)  | 1.59 (1.22-2.08)       | 1.03 (0.91-1.16) |
| 4                                                                  | 0.82 (0.54-1.22)  | 1.41 (1.07-1.87)  | 1.26 (1.03-1.55) | 1.35 (0.87-2.09)  | 1.84 (1.42-2.39)       | 1.14 (1.01-1.28) |
| Wealthiest                                                         | 1.09 (0.72-1.63)  | 1.54 (1.14-2.08)  | 1.42 (1.16-1.78) | 1.27 (0.77-2.10)  | 2.23 (1.72-2.89)       | 1.14 (0.99-1.30) |
| <b>Education</b>                                                   |                   |                   |                  |                   |                        |                  |
| None                                                               | 1.51 (0.35-6.57)  | 1.08 (0.49-2.37)  | 0.92 (0.68-1.21) | 1.45 (0.53-4.00)  | 1.16 (0.84-1.61)       | 1.18 (1.06-1.31) |
| Standard1-5                                                        | 0.93 (0.52-1.67)  | 0.94 (0.65-1.37)  | 1.03 (0.87-1.22) | 1.54 (0.89-2.67)  | 1.09 (0.88-1.34)       | 1.15 (1.04-1.26) |
| Standard 6-8                                                       | Ref               | Ref               | Ref              | Ref               | Ref                    | Ref              |
| Secondary                                                          | 0.92 (0.67-1.26)  | 0.99 (0.81-1.21)  | 1.16 (1.01-1.34) | 1.05 (0.73-1.51)  | 0.97 (0.82-1.14)       | 1.01 (0.89-1.15) |
| Post-secondary                                                     | 1.39 (0.91-2.14)  | 1.44 (1.11-1.88)  | 1.21 (1.01-1.44) | 1.03 (0.59-1.80)  | 1.06 (0.82-1.37)       | 1.05 (0.84-1.30) |
| <b>Employment</b>                                                  |                   |                   |                  |                   |                        |                  |
| Not working                                                        | 0.58 (0.41-0.81)  | 0.82 (0.57-1.20)  | 1.71 (1.42-2.06) | 0.66 (0.41-1.08)  | 0.88 (0.66-1.18)       | 1.51 (1.32-1.73) |
| Housework                                                          | 0.83 (0.49-1.43)  | 0.62 (0.32-1.17)  | 1.36 (1.02-1.83) | 0.95 (0.61-1.48)  | 1.02 (0.86-1.21)       | 1.16 (1.01-1.34) |
| Subsistence                                                        | 0.83 (0.54-1.27)  | 0.96 (0.74-1.25)  | 1.15 (0.93-1.43) | 0.59 (0.32-1.10)  | 0.73 (0.56-0.97)       | 0.93 (0.80-1.07) |
| Self-employed                                                      | Ref               | Ref               | Ref              | Ref               | Ref                    | Ref              |
| Salaried                                                           | 0.68 (0.46-1.01)  | 1.05 (0.86-1.28)  | 1.00 (0.81-1.24) | 1.20 (0.69-2.09)  | 0.95 (0.77-1.17)       | 1.20 (0.96-1.50) |
| Site – age stratification                                          |                   |                   |                  |                   |                        |                  |
|                                                                    | Rural < 30 years  | Rural 30-50 years | Rural 50+ years  | Urban < 30 Years  | Urban 30-50 years      | Urban 50+ years  |
| <b>Sex</b>                                                         |                   |                   |                  |                   |                        |                  |
| Male                                                               | Ref               | Ref               | Ref              | Ref               | Ref                    | Ref              |
| Female                                                             | 0.33 (0.23-0.47)  | 0.65 (0.54-0.78)  | 1.30 (1.18-1.44) | 0.43 (0.34-0.54)  | 0.90 (0.79-1.04)       | 1.14 (1.03-1.26) |
| <b>Wealth quintiles</b>                                            |                   |                   |                  |                   |                        |                  |
| Poorest                                                            | Ref               | Ref               | Ref              | Ref               | Ref                    | Ref              |
| 2                                                                  | 1.16 (0.76-1.76)  | 1.23 (0.96-1.58)  | 0.95 (0.84-1.06) | 0.72 (0.44-1.17)  | 1.44 (1.04-1.98)       | 1.09 (0.85-1.40) |
| 3                                                                  | 1.10 (0.69-1.77)  | 1.35 (1.03-1.78)  | 1.05 (0.93-1.19) | 1.16 (0.78-1.72)  | 1.72 (1.29-2.30)       | 1.27 (1.02-1.58) |
| 4                                                                  | 0.87 (0.50-1.50)  | 1.40 (1.05-1.86)  | 1.02 (0.89-1.17) | 1.10 (0.75-1.60)  | 1.97 (1.49-2.60)       | 1.61 (0.31-1.97) |
| Wealthiest                                                         | 0.78 (0.36-1.70)  | 1.45 (1.00-2.08)  | 1.07 (0.89-1.28) | 1.23 (0.84-1.82)  | 2.31 (1.75-3.05)       | 1.63 (1.33-2.01) |
| <b>Education</b>                                                   |                   |                   |                  |                   |                        |                  |
| None                                                               | 2.95 (0.81-10.75) | 1.39 (0.81-2.37)  | 1.21 (1.07-1.38) | 1.06 (0.38-2.95)  | 1.08 (0.75-1.55)       | 1.10 (0.95-1.27) |
| Standard1-5                                                        | 1.30 (0.70-2.42)  | 0.96 (0.72-1.29)  | 1.15 (1.04-1.28) | 1.10 (0.65-1.85)  | 1.11 (0.88-1.41)       | 1.03 (0.90-1.17) |
| Standard 6-8                                                       | Ref               | Ref               | Ref              | Ref               | Ref                    | Ref              |
| Secondary                                                          | 1.13 (0.79-1.60)  | 0.95 (0.77-1.17)  | 1.14 (0.98-1.32) | 0.88 (0.64-1.20)  | 0.98 (0.83-1.16)       | 1.02 (0.91-1.15) |
| Post-secondary                                                     | 2.38 (0.79-7.15)  | 1.37 (0.83-2.27)  | 1.67 (1.28-2.18) | 1.09 (0.74-1.60)  | 1.18 (0.96-1.44)       | 1.03 (0.89-1.20) |
| <b>Employment</b>                                                  |                   |                   |                  |                   |                        |                  |
| Not working                                                        | 0.75 (0.44-1.28)  | 0.82 (0.48-1.42)  | 1.71 (1.42-2.06) | 0.53 (0.39-0.73)  | 0.88 (0.68-1.13)       | 1.50 (1.31-1.72) |
| Housework                                                          | 1.84 (0.89-3.79)  | 0.94 (0.60-1.46)  | 1.24 (0.99-1.54) | 0.71 (0.51-0.99)  | 1.05 (0.89-1.24)       | 1.21 (1.05-1.40) |
| Subsistence                                                        | 0.93 (0.57-1.51)  | 0.78 (0.62-0.97)  | 1.05 (0.88-1.26) | 1.00 (0.16-6.25)  | 1.47 (0.80-2.68)       | 1.00 (0.64-1.55) |
| Self-employed                                                      | Ref               | Ref               | Ref              | Ref               | Ref                    | Ref              |
| Salaried                                                           | 0.86 (0.32-2.30)  | 0.93 (0.66-1.31)  | 1.03 (0.78-1.36) | 0.75 (0.53-1.07)  | 1.01 (1.01 (0.87-1.19) | 1.01 (0.85-1.20) |

<sup>1</sup>Systolic  $\geq 140$ mmHg and/or diastolic  $\geq 90$ mmHg and/or on antihypertensive medication

<sup>2</sup>Adjusted for distal factors; age, site (urban/rural), wealth, education, occupation (see Suppl. Figure 1. Conceptual model of risk factors for cardiometabolic outcomes (web appendix page 2)).

**Supplementary Table 4: Hypertension: Screening, cascade of care, access to diagnostic testing, a previous diagnosis, medication and control**

|                                                                                                                                                | Total                | Rural Male         | Rural Female         | Urban Male         | Urban Female         |
|------------------------------------------------------------------------------------------------------------------------------------------------|----------------------|--------------------|----------------------|--------------------|----------------------|
| <b>Of individuals aged ≥40 years N=8,552</b>                                                                                                   |                      |                    |                      |                    |                      |
| Blood pressure measured ever                                                                                                                   | 3,564/8,552<br>41.7% | 378/2,180<br>17.3% | 998/3,061<br>32.6%   | 742/1,288<br>57.6% | 1,446/2,023<br>71.5% |
| Blood pressure measured ≥40 years                                                                                                              | 3,140/8,552<br>36.7% | 354/2,180<br>16.2% | 820/3,061<br>26.8%   | 682/1,288<br>53.0% | 1,284/2,023<br>63.5% |
| <b>Of overweight and obese individuals N=8,702</b>                                                                                             |                      |                    |                      |                    |                      |
| Blood pressure measured ever                                                                                                                   | 5,238/8,702<br>60.2% | 132/536<br>24.6%   | 1,178/2,570<br>45.8% | 611/8,702<br>63.5% | 3,317/4,633<br>71.2% |
| <b>Of all current hypertensives, previously diagnosed<sup>1</sup> and on medication, and undiagnosed N=4,096</b>                               |                      |                    |                      |                    |                      |
| Blood pressure measured ever                                                                                                                   | 2,277/4,096<br>55.6% | 214/787<br>27.2%   | 483/1,101<br>43.9%   | 507/859<br>59.0%   | 1,073/1,349<br>79.5% |
| Previously diagnosed                                                                                                                           | 1,708/4,096<br>41.7% | 172/787<br>21.9%   | 482/1,101<br>43.8%   | 295/859<br>34.3%   | 759/1,349<br>56.3%   |
| On medication                                                                                                                                  | 1,189/4,096<br>29.0% | 127/787<br>16.1%   | 382/1,101<br>34.7%   | 180/859<br>21.0%   | 500/1,349<br>37.1%   |
| <b>Of previously diagnosed hypertensives on regular medication and for whom a blood pressure measurement was available N=1,183<sup>2</sup></b> |                      |                    |                      |                    |                      |
| Blood pressure controlled <140/90 mmHg                                                                                                         | 440/1,183<br>37.2%   | 41/127<br>32.3%    | 148/378<br>39.2%     | 50/179<br>27.9%    | 201/499<br>40.3%     |

<sup>1</sup>Excludes 849 people with a prior diagnosis of hypertension who were not on medication but did not have hypertension (BP>140/90) when measured in the study

<sup>2</sup>Excludes 6 people who did not have blood pressure measured during the study

**Supplementary Table 5: Diabetes: Screening, cascade of care, access to diagnostic testing, a previous diagnosis, medication and control**

|                                                                                       | <b>Total</b> | <b>Rural Male</b> | <b>Rural Female</b> | <b>Urban Male</b> | <b>Urban Female</b> |
|---------------------------------------------------------------------------------------|--------------|-------------------|---------------------|-------------------|---------------------|
| <b>Of individuals aged ≥ 40 years and over N=8,552</b>                                |              |                   |                     |                   |                     |
| Blood glucose test ever                                                               | 858/8,552    | 109/2,180         | 140/3,061           | 243/1,288         | 366/2,023           |
|                                                                                       | 10.0%        | 5.0%              | 4.6%                | 18.9%             | 18.1%               |
| Blood glucose measured ≥40 years                                                      | 784/8,552    | 99/2,180          | 130/3,061           | 220/1,288         | 335/2,023           |
|                                                                                       | 9.2%         | 4.5%              | 4.3%                | 17.1%             | 16.6%               |
| <b>Of overweight and obese individuals N=8,702</b>                                    |              |                   |                     |                   |                     |
| Blood glucose test ever                                                               | 891/8,702    | 42/536            | 109/2,570           | 191/963           | 549/4,633           |
|                                                                                       | 10.2%        | 7.8%              | 4.2%                | 19.8%             | 11.8%               |
| <b>Of all individuals with diabetes, previously diagnosed &amp; undiagnosed N=566</b> |              |                   |                     |                   |                     |
| Blood glucose test ever <sup>1</sup>                                                  | 304/566      | 32/84             | 53/124              | 86/133            | 133/225             |
|                                                                                       | 53.7%        | 38.1%             | 42.7%               | 64.7%             | 59.1%               |
| Previously diagnosed                                                                  | 333/566      | 41/84             | 69/124              | 84/133            | 139/225             |
|                                                                                       | 58.8%        | 48.8%             | 55.7%               | 63.2%             | 61.8%               |
| <b>Of all previously diagnosed diabetic individuals N=333</b>                         |              |                   |                     |                   |                     |
| On regular medication                                                                 | 227/333      | 33/41             | 47/69               | 55/84             | 92/139              |
|                                                                                       | 68.2%        | 80.5%             | 68.1%               | 65.5%             | 66.2%               |
| Blood glucose controlled<br>FBG <7.0 mmol/L                                           | 157/293      | 21/37             | 32/63               | 44/69             | 60/124              |
|                                                                                       | 53.6%        | 56.8%             | 50.8%               | 63.8%             | 48.4%               |
| <b>Of diagnosed diabetic individuals on regular medication N=227</b>                  |              |                   |                     |                   |                     |
| Blood glucose controlled<br>FBG <7.0 mmol/L                                           | 84/207       | 14/29             | 18/46               | 25/47             | 27/83               |
|                                                                                       | 40.6%        | 48.3%             | 39.1%               | 53.2%             | 31.8%               |

<sup>1</sup>54 individuals previously diagnosed with diabetes reported never to have had a blood test for glucose, including 19 people on regular medication.

**Supplementary Table 6: Associations of risk factors with multi-morbidity<sup>1</sup> – age-adjusted and distal factor adjusted risk ratios**

| Characteristics             | Males<br>N=8,936                    |                                             | Females<br>N=14,199                 |                                             |
|-----------------------------|-------------------------------------|---------------------------------------------|-------------------------------------|---------------------------------------------|
|                             | Age-adjusted Risk Ratio<br>(95% CI) | Adjusted Risk Ratio <sup>2</sup><br>(95%CI) | Age-adjusted Risk Ratio<br>(95% CI) | Adjusted Risk Ratio <sup>2</sup><br>(95%CI) |
| <b>Site</b>                 |                                     |                                             |                                     |                                             |
| Karonga (rural)             | Ref                                 | Ref                                         | Ref                                 | Ref                                         |
| Lilongwe (urban)            | 4.00 (3.04-5.25)                    | 1.91 (1.31-2.78)                            | 3.11 (2.71-3.58)                    | 1.43 (1.17-1.74)                            |
| <b>Age group; years</b>     |                                     |                                             |                                     |                                             |
| 18-29                       | Ref                                 | Re                                          | Ref                                 | Ref                                         |
| 30-39                       | 8.66 (4.05-18.49)                   | 9.81 (4.44-21.68)                           | 5.89 (4.04-8.58)                    | 5.72 (3.89-8.42)                            |
| 40-49                       | 16.10 (7.59-34.15)                  | 17.71 (8.05-38.96)                          | 16.34 (11.37-23.48)                 | 17.44 (11.92-25.51)                         |
| 50-59                       | 28.41 (13.46-59.95)                 | 37.83 (17.45-82.03)                         | 29.72 (20.78-42.51)                 | 36.47 (25.11-52.98)                         |
| 60-69                       | 61.07 (29.37-127.00)                | 75.19 (36.16-156.35)                        | 36.57 (25.36-52.73)                 | 50.81 (34.94-73.88)                         |
| 70+                         | 31.57 (14.48-68.83)                 | 72.70 (32.89-160.70)                        | 31.76 (21.48-46.94)                 | 51.76 (34.42-77.87)                         |
| <b>Wealth quintiles</b>     |                                     |                                             |                                     |                                             |
| Poorest                     | Ref                                 | Ref                                         | Ref                                 | Ref                                         |
| 2                           | 1.50 (0.70-3.24)                    | 1.27 (0.59-2.76)                            | 1.62 (1.16-2.29)                    | 1.64 (1.17-2.31)                            |
| 3                           | 2.34 (1.11-4.91)                    | 1.59 (0.75-3.37)                            | 2.62 (1.91-3.61)                    | 2.19 (1.59-3.03)                            |
| 4                           | 4.91 (2.44-9.84)                    | 2.56 (1.25-5.24)                            | 4.56 (3.39-6.12)                    | 3.24 (2.40-4.38)                            |
| Wealthiest                  | 10.54 (5.34-20.81)                  | 3.91 (1.91-7.98)                            | 6.48 (4.82-8.70)                    | 3.96 (2.90-5.39)                            |
| <b>Education</b>            |                                     |                                             |                                     |                                             |
| None                        | <0.001 (0.001-<0.001)               | <0.001 (0.001-<0.001)                       | 0.82 (0.63-1.08)                    | 0.95 (0.72-1.25)                            |
| Standard 1-5                | 0.60 (0.30-1.19)                    | 0.65 (0.33-1.30)                            | 0.85 (0.77-1.16)                    | 1.07 (0.88-1.30)                            |
| Standard 5-8                | Ref                                 | Ref                                         | Ref                                 | Ref                                         |
| Secondary                   | 2.44 (1.70-3.51)                    | 1.67 (1.13-2.46)                            | 1.88 (2.59-3.99)                    | 1.16 (0.96-1.39)                            |
| Post-secondary              | 7.06 (4.90-10.12)                   | 2.90 (1.89-4.44)                            | 3.21 (2.59-3.99)                    | 1.46 (1.11-1.93)                            |
| <b>Employment</b>           |                                     |                                             |                                     |                                             |
| Not working                 | 1.17 (0.80-1.71)                    | 0.80 (0.54-1.18)                            | 0.87 (0.68-1.11)                    | 0.74 (0.58-0.96)                            |
| Housework                   | 0.66 (0.29-1.53)                    | 0.66 (0.29-1.48)                            | 0.96 (0.79-1.16)                    | 0.88 (0.72-1.07)                            |
| Subsistence                 | 0.29 (0.19-0.44)                    | 0.74 (0.45-1.21)                            | 0.30 (0.24-0.38)                    | 0.50 (0.38-0.65)                            |
| Self-employed               | Ref                                 | Ref                                         | Ref                                 | Ref                                         |
| Salaried                    | 1.08 (0.75-1.55)                    | 0.73 (0.50-1.05)                            | 1.36 (1.08-1.72)                    | 0.87 (0.67-1.15)                            |
| <b>Physical activity</b>    |                                     |                                             |                                     |                                             |
| Did not meet                | 2.58 (1.92-3.47)                    | 1.23 (1.01-1.51)                            | 1.68 (1.29-2.20)                    | 1.31 (1.00-1.73)                            |
| Met recommendation          | Ref                                 | Ref                                         | Ref                                 | Ref                                         |
| <b>Smoking</b>              |                                     |                                             |                                     |                                             |
| Not current                 | Ref                                 | Ref                                         | Ref                                 | Ref                                         |
| Current                     | 0.26 (0.13-0.50)                    | 0.47 (0.24-0.92)                            | 0.33 (0.05-2.21)                    | 0.46 (0.08-2.75)                            |
| <b>Alcohol</b>              |                                     |                                             |                                     |                                             |
| Not in last year            | Ref                                 | Ref                                         | Ref                                 | Ref                                         |
| In last year                | 0.73 (0.55-0.96)                    | 0.98 (0.74-1.29)                            | 1.84 (1.43-2.37)                    | 1.84 (1.42-2.38)                            |
| <b>Sugary drinks intake</b> |                                     |                                             |                                     |                                             |
| <6 tsps/day                 | Ref                                 | Ref                                         | Ref                                 | Ref                                         |
| ≥6 tsps/day                 | 0.86 (0.64-1.34)                    | 0.74 (0.56-0.99)                            | 1.09 (0.93-1.27)                    | 0.93 (0.79-1.09)                            |

<sup>1</sup> Multi-morbidity is defined as more than one concurrent condition of hypertension (Systolic  $\geq$ 140mmHg and/or diastolic  $\geq$ 90mmHg and/or on antihypertensive medication), diabetes (FBG  $\geq$ 7.0mmol/L, or a previous self-reported diagnosis by a health professional, whether or not on medication) or obesity (BMI  $\geq$ 30kg/m<sup>2</sup>)

<sup>2</sup>Adjusted for distal factors; age, site, wealth, education, occupation (see Suppl. Figure 1. Conceptual model of risk factors for cardiometabolic outcomes (web appendix page 2))

**Supplementary Table 7: Prevalence of co-morbidities amongst diabetic and hypertensive participants**

|                                  | <b>Rural<br/>Male<br/>n/N (%)</b> | <b>Rural<br/>Female<br/>n/N (%)</b> | <b>Urban<br/>Male<br/>n/N (%)</b> | <b>Urban<br/>Female<br/>n/N (%)</b> |
|----------------------------------|-----------------------------------|-------------------------------------|-----------------------------------|-------------------------------------|
| <b>Diabetic participants</b>     |                                   |                                     |                                   |                                     |
| <b>Hypertension</b>              | 44/84 (52.4)                      | 64/124 (51.6)                       | 79/133 (59.4)                     | 138/225 (61.3)                      |
| <b>Obesity</b>                   | 5/84 (6.0)                        | 42/120 (35.0)                       | 23/133 (17.3)                     | 120/219 (54.8)                      |
| <b>Hypertensive participants</b> |                                   |                                     |                                   |                                     |
| <b>Diabetes</b>                  | 44/677 (6.5)                      | 64/941 (6.8)                        | 79/670 (11.8)                     | 138/1,134 (12.2)                    |
| <b>Obesity</b>                   | 33/781 (4.2)                      | 210/1,073 (19.6)                    | 106/858 (12.4)                    | 504/1,329 (37.9)                    |

**Supplementary Table 8: Risk ratios (RR) for associations between a previous diagnosis and treatment for hypertension or diabetes and a diagnosis and medication for the other condition**

| <b>Hypertension status in study</b>              | <b>RR of previous diabetes diagnosis</b><br>N =566<br><b>Adjusted RR<sup>1</sup> (95% CI)</b> | <b>RR of already being on medication in those with previous diabetes diagnosis</b><br>N=333<br><b>Adjusted RR<sup>1</sup> (95% CI)</b>        |
|--------------------------------------------------|-----------------------------------------------------------------------------------------------|-----------------------------------------------------------------------------------------------------------------------------------------------|
| No hypertension                                  | Ref                                                                                           | Ref                                                                                                                                           |
| Hypertension; previously undiagnosed             | 0.57 (0.39-0.82)                                                                              | 0.91 (0.65-1.26)                                                                                                                              |
| Previously diagnosed hypertension; no medication | 1.23 (0.99-1.54)                                                                              | 0.62 (0.42-0.92)                                                                                                                              |
| Previously diagnosed hypertension; on medication | 1.35 (1.12-1.64)                                                                              | 1.21 (1.00-1.47)                                                                                                                              |
| <b>Diabetes status in study</b>                  | <b>RR of hypertension diagnosis</b><br>N=3422<br><b>Adjusted RR<sup>1</sup> (95% CI)</b>      | <b>RR of already being on medication in those with a previous hypertension diagnosis</b><br>N=2216<br><b>Adjusted RR<sup>1</sup> (95% CI)</b> |
| No diabetes                                      | Ref                                                                                           | Ref                                                                                                                                           |
| Diabetes; previously undiagnosed                 | 1.16 (0.98-1.36)                                                                              | 1.38 (1.17-1.63)                                                                                                                              |
| Previously diagnosed diabetes; no medication     | 1.80 (1.53-2.11)                                                                              | 1.05 (0.79-1.41)                                                                                                                              |
| Previously diagnosed diabetes; on medication     | 1.83 (1.69-1.99)                                                                              | 1.61 (1.48-1.75)                                                                                                                              |

<sup>1</sup>Adjusted for site, sex and age
